# Supplementary material for: Diurnal Asymmetry in Nonlinear Responses of Canopy Urban Heat Island to Urban Morphology in Beijing during Heat Wave Periods
Source: Copernicus journal article supplement (doi:10.5194/egusphere-2025-2785), 2025-07-16
Supplement: Supplementary file 1 [file egusphere-2025-2785-supplement.pdf]

# Diurnal Asymmetry in Nonlinear Responses of Canopy Urban Heat Island to Urban Morphology in Beijing during Heat Wave Periods

Tao Shi<sup>1,2,3,4</sup>, Yuanjian Yang<sup>5\*</sup>, Ping Qi<sup>1</sup>, Simone Lolli<sup>6</sup>

<sup>1</sup>School of Mathematics and Computer Science, Tongling University, Tongling, 244000, China

<sup>2</sup>Anhui Province Key Laboratory of Physical Geographic Environment, Chuzhou University, Chuzhou, 239000, China

<sup>3</sup>Anhui Engineering Research Center of Remote Sensing and Geoinformatics, Chuzhou, 239000, China

<sup>4</sup>Anhui Center for Collaborative Innovation in Geographical Information Integration and Application, Chuzhou, 239000, China

<sup>5</sup>State Key Laboratory of Climate System Prediction and Risk Management, School of Atmospheric Physics, Nanjing University of Information Science and Technology, Nanjing 210044, China

<sup>6</sup>CNR-IMAA, Contrada S. Loja, 85050 Tito Scalo (PZ), Italy

Correspondence to: Prof. Yuanjian Yang ([yyj1985@nuist.edu.cn](mailto:yyj1985@nuist.edu.cn))

**Table S1: The calculation and definitions of urban morphology indicators involved in this paper.**

| Type | Indicators | Calculation                                                                                                | Definitions                                                                                  |
|------|------------|------------------------------------------------------------------------------------------------------------|----------------------------------------------------------------------------------------------|
| 2D   | BCR        | $BCR = \frac{\sum a_i}{A}$ <p>a<sub>i</sub>: Area of individual building patches</p> <p>A: Total area.</p> | Building coverage ratio (BCR):<br>The ratio of building base area to buffer area.            |
|      | NEAR       | $NEAR = \min(\sqrt{(x_i - x_j)^2 + (y_i - y_j)^2})$ <p>(x,y): Coordinates of building centroids.</p>       | Average adjacent building distance (NEAR): A lower value indicates higher building density.  |
|      | NP         | $NP = \sum BP$ <p>BP: building patches.</p>                                                                | Number of building patches (NP):<br>Reflects the fragmentation degree of regional buildings. |
|      | SPLIT      | $SPLIT = \frac{A^2}{\sum a_i^2}$                                                                           | Split index (SPLIT): A larger value indicates a higher degree of landscape fragmentation.    |
|      | AI         | $AI = \left[ \frac{g_{ij}}{\max(g_{ij})} \right] \times 100$                                               | Aggregation index (AI): A                                                                    |

|    |       |                                                                                                                                                     |                                                                                                                                                            |
|----|-------|-----------------------------------------------------------------------------------------------------------------------------------------------------|------------------------------------------------------------------------------------------------------------------------------------------------------------|
|    |       | $g_{ii}$ : Number of like adjacencies between buildings.                                                                                            | smaller value indicates weaker connectivity of landscape patches.                                                                                          |
|    | L/W   | $L/W = \left[ \frac{\text{Longest axis length}}{\text{Shortest axis length}} \right] \times 100$                                                    | Building length-width ratio (L/W): Characterizes the planar morphological characteristics of buildings.                                                    |
|    | H     | $H = \frac{\sum h_i}{NP}$<br>$h_i$ : Height of individual buildings.                                                                                | Average building height (H): The mean value of building heights within the buffer.                                                                         |
|    | H-max | $H\text{-max} = \max(h_1, h_2, \dots, h_n)$                                                                                                         | Maximum building height (H_max): The highest building height in the region.                                                                                |
|    | H-std | $H\text{-std} = \sqrt{\frac{\sum (h_i - H)^2}{NP}}$                                                                                                 | Building height standard deviation (H_std): Reflects the difference in building heights in the region.                                                     |
| 3D | FAR   | $FAR = \frac{\sum a_i * n}{A}$<br>$n$ : Number of floors in the building.                                                                           | Floor area ratio (FAR): The ratio of total building area to buffer area, where a higher value indicates greater development intensity per unit land.       |
|    | CI    | $CI = \frac{V_{\text{building}}}{V_{\text{total area}}}$<br>$V_{\text{building}}$ : Building volume. $V_{\text{total area}}$ : Neighborhood volume. | Volume index (CI): The ratio of building volume to the total volume of the study area, where a larger value indicates a higher degree of space occupation. |
|    | SVF   | $SVF = 1 - \frac{\sum \gamma_i * \Delta\theta}{2\pi}$<br>$\gamma_i$ : Obstruction elevation angle.<br>$\Delta\theta$ : Azimuth interval.            | Sky view factor (SVF): Ranges from 0 to 1, where a smaller value indicates more significant sky                                                            |

---

obstruction.

---
