# Supplementary material for: Diurnal Asymmetry in Nonlinear Responses of Canopy Urban Heat Island to Urban Morphology in Beijing during Heat Wave Periods
Source: Copernicus journal article supplement (doi:10.5194/egusphere-2025-2785), 2025-07-16
Supplement: Supplementary file [file egusphere-2025-2785-AC1-supplement.pdf]

# Response to Review Comments of the First Reviewer

Dear Reviewer and Editors:

We are sincerely grateful to the editor and reviewer for their valuable time for reviewing our manuscript. The comments are very helpful and valuable, and we have addressed the issues raised by the reviewer in the revised manuscript. Please find our point-by-point response (in blue text) to the comments (in black text) raised by the reviewer. We have revised the paper according to your comments (highlighted in red text of the revised manuscript).

Sincerely yours,

Dr. Yuanjian Yang, representing all co-authors

## Major comments:

**1. Section 2.2.2: Six 2D and 3D indicators are selected as predictor variables for CUHI, but there can be more indicators. Could authors justify why these indicators are used? A review on morphology variables used in previous regression/ML methods is needed.**

**Response:** We apologize for the vague description. As requested, we have supplemented a review of morphology variables used in previous study. Please refer to Lines 96-116 for the revised content:

“From a spatial perspective, urban spatial morphology can be divided into urban 2D/3D morphology. At the 2D level, academic circles have systematically explored the association between urban morphology and local thermal environments (Tysa et al., 2019; Yu et al., 2020). For instance, the proportion of building area has a significant warming effect (Wang et al., 2017; Liu et al., 2021), and studies have shown that when the building area is fixed, there is a significant positive correlation between temperature and the building patch index (Shi et al., 2015). In addition to 2D

morphology, the regulatory role of 3D urban morphology in thermal environments has attracted much attention in recent years (Yin et al., 2018; Tian et al., 2019; Zhou et al., 2022; Xu et al., 2024; Bansal & Quan, 2024). Although 3D morphology is based on 2D pattern parameters with the addition of height information, its characterization is not limited to height but also includes other features derived from height. Taking the sky view factor (SVF) as an example, this indicator refers to the ratio of the visible sky range to the total visible range at a fixed point on the ground. It is an important parameter for characterizing the geometric characteristics, density, and thermal balance of urban areas, and also a key factor affecting the generation and intensity of the heat island effect (Scarano & Mancini, 2017). Relevant studies have shown that surface temperature in summer is significantly correlated with building height (Cai & Xu, 2017); regulating SVF may serve as a potential means to mitigate the urban local thermal environment in high-density urban areas (Xu et al., 2024). We obtained building data from Baidu Maps (<https://map.baidu.com>), including building base projection boundaries and total floor information. The building base projection boundaries can be used to characterize the horizontal distribution of urban buildings. We calculate the height of the building by multiplying the number of floors by 3 meters. This method has been verified to have an overall accuracy of 86.78% (Liu et al., 2021), and the conversion results are reliable based on the regular characteristics of the floor heights of urban buildings (Alavipanah et al., 2018). The specific definitions and calculations of the 2D/3D indicators are as follows in Table S1. Finally, we selected a 500m buffer zone (Oke, 2004) and used the six two-dimensional indicators and six three-dimensional indicators to describe the morphological characteristics of buildings.”

**Table S1: The calculation and definitions of urban morphology indicators involved in this paper.**

| Type | Indicators | Calculation                                                                             | Definitions                                                                  |
|------|------------|-----------------------------------------------------------------------------------------|------------------------------------------------------------------------------|
| 2D   | BCR        | $BCR = \frac{\sum a_i}{A}$ <p><math>a_i</math>: Area of individual building patches</p> | <p>Building coverage ratio (BCR):</p> <p>The ratio of building base area</p> |

|       |                                                                                                                                        |                                                                                                                |
|-------|----------------------------------------------------------------------------------------------------------------------------------------|----------------------------------------------------------------------------------------------------------------|
|       | A: Total area.                                                                                                                         | to buffer area.                                                                                                |
| NEAR  | $NEAR = \min(\sqrt{(x_i - x_j)^2 + (y_i - y_j)^2})$ <p>(x,y): Coordinates of building centroids.</p>                                   | <p>Average adjacent building distance (NEAR): A lower value indicates higher building density.</p>             |
| NP    | $NP = \sum BP$ <p>BP: building patches.</p>                                                                                            | <p>Number of building patches (NP): Reflects the fragmentation degree of regional buildings.</p>               |
| SPLIT | $SPLIT = \frac{A^2}{\sum a_i^2}$                                                                                                       | <p>Split index (SPLIT): A larger value indicates a higher degree of landscape fragmentation.</p>               |
| AI    | $AI = \left[ \frac{g_{ij}}{\max(g_{ij})} \right] \times 100$ <p><math>g_{ij}</math>: Number of like adjacencies between buildings.</p> | <p>Aggregation index (AI): A smaller value indicates weaker connectivity of landscape patches.</p>             |
| L/W   | $L/W = \left[ \frac{\text{Longest axis length}}{\text{Shortest axis length}} \right] \times 100$                                       | <p>Building length-width ratio (L/W): Characterizes the planar morphological characteristics of buildings.</p> |
| H     | $H = \frac{\sum h_i}{NP}$ <p><math>h_i</math>: Height of individual buildings.</p>                                                     | <p>Average building height (H): The mean value of building heights within the buffer.</p>                      |
| H-max | $H\text{-max} = \max(h_1, h_2, \dots, h_n)$                                                                                            | <p>Maximum building height (H_max): The highest building height in the region.</p>                             |
| H-std | $H\text{-std} = \sqrt{\frac{\sum (h_i - H)^2}{NP}}$                                                                                    | <p>Building height standard deviation (H_std): Reflects the difference in building heights in the region.</p>  |

---

|     |                                                                                                                                                                   |                                                                                                                                                            |
|-----|-------------------------------------------------------------------------------------------------------------------------------------------------------------------|------------------------------------------------------------------------------------------------------------------------------------------------------------|
| FAR | $FAR = \frac{\sum a_i * n}{A}$ <p>n: Number of floors in the building.</p>                                                                                        | Floor area ratio (FAR): The ratio of total building area to buffer area, where a higher value indicates greater development intensity per unit land.       |
| CI  | $CI = \frac{V_{building}}{V_{total\ area}}$ <p>V<sub>building</sub>: Building volume. V<sub>total area</sub>: Neighborhood volume.</p>                            | Volume index (CI): The ratio of building volume to the total volume of the study area, where a larger value indicates a higher degree of space occupation. |
| SVF | $SVF = 1 - \frac{\sum \gamma_i * \Delta\theta}{2\pi}$ <p><math>\gamma_i</math>: Obstruction elevation angle.<br/><math>\Delta\theta</math>: Azimuth interval.</p> | Sky view factor (SVF): Ranges from 0 to 1, where a smaller value indicates more significant sky obstruction.                                               |

---

## Reference:

- Bansal, P., Quan, S. J.: Examining temporally varying nonlinear effects of urban form on urban heat island using explainable machine learning: A case of Seoul, *Building and Environment*, 247, 110957, <https://doi.org/10.1016/j.buildenv.2023.110957>, 2024.
- Cai, H., & Xu, X.: Impacts of built-up area expansion in 2D and 3D on regional surface temperature, *Sustainability*, 9(10), <https://doi.org/10.3390/su9101862>, 2017.
- Liu, M., Ma, J., Zhou, R., Li, C., Li, D., & Hu, Y.: High-resolution mapping of mainland China's urban floor area, *Landscape and Urban Planning*, 214, 104187, <https://doi.org/10.1016/j.landurbplan.2021.104187>, 2021.
- Shi, T., Huang, Y., Shi, C., & Yang, Y.: Influence of urbanization on the thermal environment of meteorological stations: Satellite-observational evidence, *Advances in Climate Change Research*, 6(1), 7–15, <https://doi.org/10.1016/j.accre.2015.07.001>, 2015.
- Tysa, S. K., Ren, G., Qin, Y., Zhang, P., Ren, Y., Jia, W., & Wen, K.: Urbanization effect in regional temperature series based on a remote sensing classification scheme of stations,

- Journal of Geophysical Research: Atmospheres, 124(13), 7064–7079, <https://doi.org/10.1029/2019JD030948>, 2019.
- Wang, J., Tett, S. F. B., & Yan, Z.: Correcting urban bias in large-scale temperature records in China, 1980–2009, Geophysical Research Letters, 44(1), 401–408, <https://doi.org/10.1002/2016GL071524>, 2017.
- Xu, Y., Yang, J., Zheng, Y., Liu, W.: Impacts of two-dimensional and three-dimensional urban morphology on urban thermal environments in high-density cities: A case study of Hong Kong, Building and Environment, 252, 111249, <https://doi.org/10.1016/j.buildenv.2024.111249>, 2024.
- Yu, Z., Chen, S., Wong, N., Ignatius, M., Deng, J., He, Y., & Hii, D. J. C.: Dependence between urban morphology and outdoor air temperature: A tropical campus study using random forests algorithm, Sustainable Cities and Society, 61, 102200, <https://doi.org/10.1016/j.scs.2020.102200>, 2020.
- Zhou, R., Xu, H., Zhang, H., Zhang, J., Liu, M., He, T., Gao, J., Li, C.: Quantifying the Relationship between 2D/3D Building Patterns and Land Surface Temperature: Study on the Metropolitan Shanghai, Remote Sensing, 14(16), 4098, <https://doi.org/10.3390/rs14164098>, 2022.

**2. Section 2.3.1: How many HW days are found based on the criteria used in this study? This information can be put in Figure 2 to better illustrate the length of HWs.**

**Response:** Thank you for your excellent suggestion. We have added the annual duration of HW periods to Figure 2 as recommended. In addition, we have attached a table showing the monthly duration of HW periods for each year in this response. Thank you again for your valuable input.

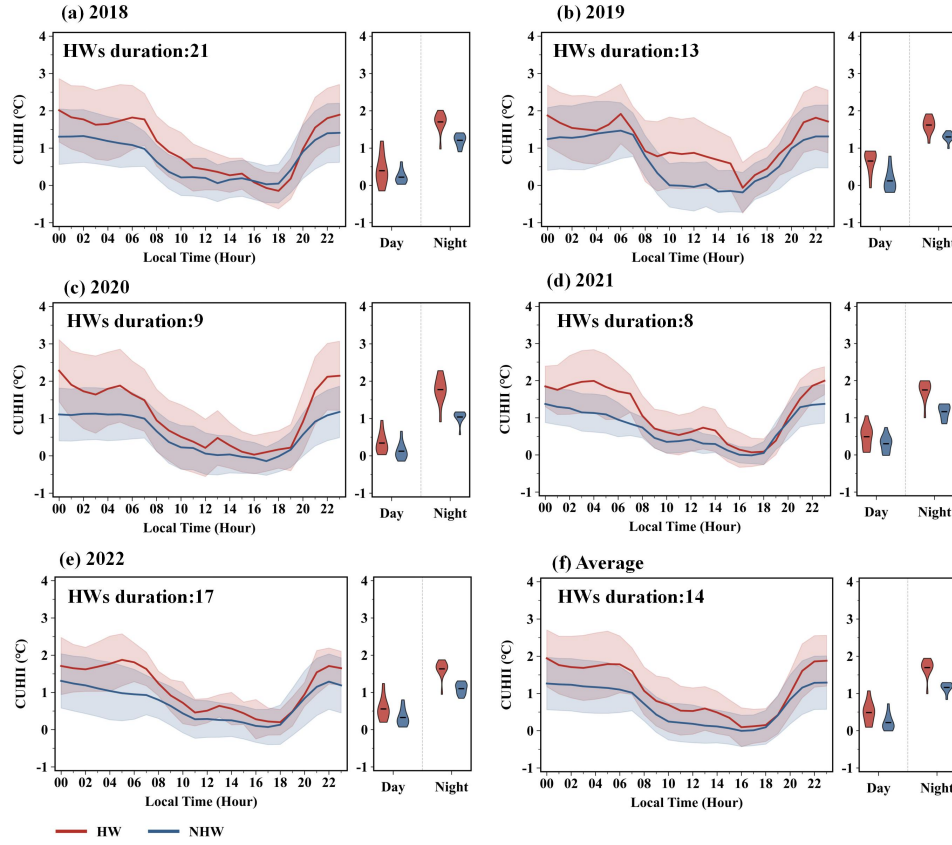

**Figure 2: Diurnal variations of the CUHII during the NHW and HW periods. (a)-(e) Year-specific patterns; (f) Multi-year average. Left panels: CUHII diurnal cycles (solid lines) with shaded areas showing standard deviations. Right panels: Violin plots of CUHII distributions during the day (08:00-19:00) and at night (00:00-07:00, 20:00-24:00).**

**Tab. R1 The duration of HW periods by year.**

| HWs period<br>duration (day) | 2018 | 2019 | 2020 | 2021 | 2022 |
|------------------------------|------|------|------|------|------|
| Jun                          | 10   | 0    | 3    | 5    | 10   |
| Jul                          | 6    | 13   | 3    | 3    | 4    |
| Aug                          | 5    | 0    | 3    | 2    | 3    |
| Sum                          | 21   | 13   | 9    | 8    | 17   |

**3. Section 2.3.3: The training process of XGBoost model requires more details. What data is used as training, validation, and test set, respectively? How is the model performance evaluated? This is the major flaw because the results in Fig.**

**5 and Fig. 6 will be significantly affected by the model performance.**

**Response:** We have supplemented these important details in the text, including specific information on the data used for the training set, validation set, and test set, as well as the methods for evaluating model performance. In addition, we have added a performance graph of the XGBoost model in predicting CUHII in the supplementary. Please refer to Lines 143-150 and 259-261 for the revised content:

“In this study, we first performed iterative calculations on 7 commonly used hyperparameters (eta, gamma, max\_depth, min\_child\_weight, subsample, colsample\_bytree, and nrounds) within a preset hyperparameter tuning space, and selected the optimal hyperparameter combination that minimizes model error using a 5-fold cross-validation method (Yang et al., 2020; Lin et al., 2024). After completing hyperparameter optimization, we randomly split the sample points in the Yangtze River Basin at a 7:3 ratio to obtain training samples (70%) and validation samples (30%), which were used for training and validating the XGBoost model, respectively. Meanwhile, the coefficient of determination ( $R^2$ ) and root mean square error (RMSE) were chosen as evaluation metrics for simulation accuracy.”

“Fig. S1 illustrates the performance of the XGBoost model in predicting CUHII. For the test dataset, the  $R^2$  values all exceed 0.45, while the RMSE values are all within 0.05. These results indicate that the XGBoost model can be regarded as a reliable tool for fitting the relationship between CUHII and urban morphology (He et al., 2024; Lin et al., 2024).”

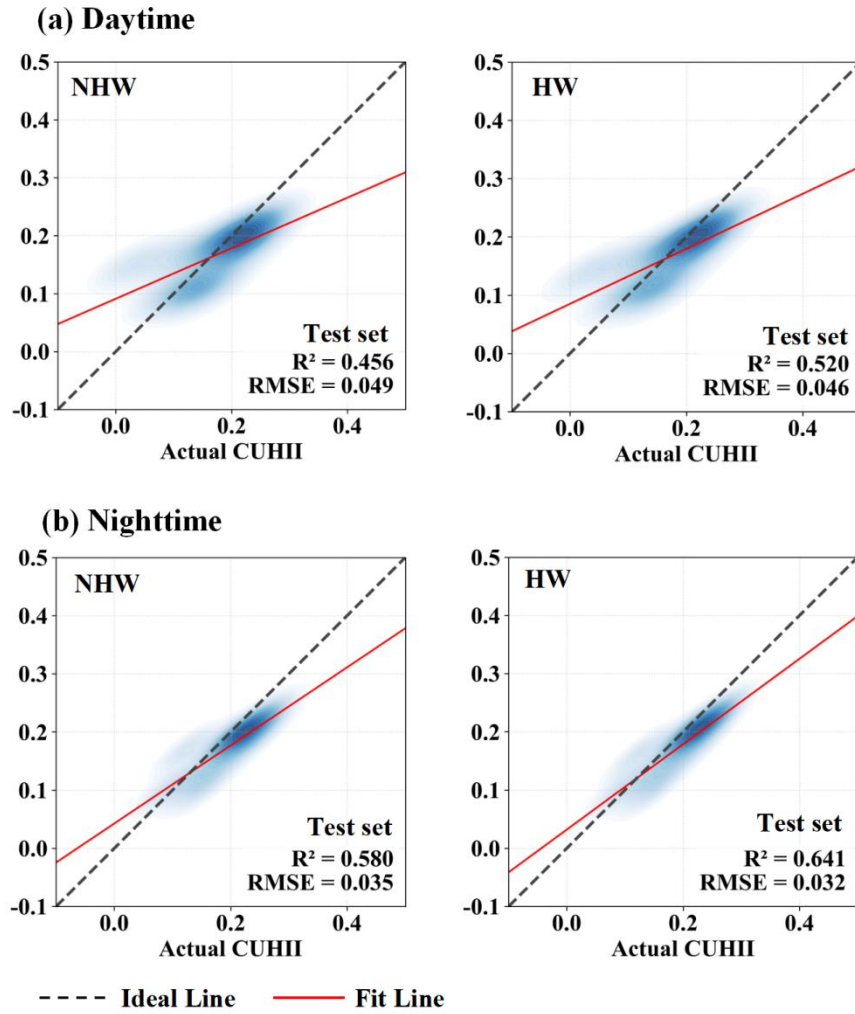

**Figure S1:** The performance graph of the XGBoost model in predicting CUHII.

**Reference:**

- He, J., Shi, Y., Xu, L., Lu, Z., Feng, M., Tang, J., & Guo, X.: Exploring the scale effect of urban thermal environment through XGBoost model, *Sustainable Cities and Society*, 114, 105763, <https://doi.org/10.1016/j.scs.2024.105763>, 2024.
- Lin, Z., Xu, H., Han, L., et al.: Day and night: Impact of 2D/3D urban features on land surface temperature and their spatiotemporal non-stationary relationships in urban building spaces, *Sustainable Cities and Society*, 108, 105507, <https://doi.org/10.1016/j.scs.2024.105507>, 2024.
- Yang, L., Xu, H., & Yu, S.: Estimating PM<sub>2.5</sub> concentrations in Yangtze River Delta region of China using random forest model and the Top-of-Atmosphere reflectance, *J. Environ. Manag.*, 272, 111061, 2020.



**4. Section 2.3.4: How did authors select study areas for ENVI-met simulations?  
And what are the values used for various thermal properties in the model setup?**

**Response:** Thank you for your insightful comments. We apologize for the lack of clarity regarding the selection of study areas and thermal property parameters in the ENVI-met model setup. We have supplemented relevant details in Section 2.3.4, and the revised content is as follows:

“ENVI-met has been widely applied in cooling effect assessment (Di Giuseppe et al., 2021), temperature field prediction (Forouzandeh, 2021), and thermal comfort research (Berardi et al., 2020). The selection of ENVI-met simulation areas in this study was based on two core principles: ① Urban morphological representativeness: Typical functional zones in Beijing were selected, covering dominant urban forms such as high-density high-rises and low-density low-rises, which can reflect the representative spatial characteristics of Beijing’s urban area; ② Data support: These zones are equipped with long-term AWS operated by the China Meteorological Administration, which provide continuous air temperature data at a height of 1.5 meters, serving as a reliable benchmark for model validation.

The model integrates high-resolution Google Earth imagery and field survey data to accurately construct the three-dimensional spatial configuration of buildings, vegetation, and soil, with vegetation parameters derived from ENVI-met’s 3D plant database. The horizontal extent of the model was set to 1×1 km (200×200 grids, 5 m resolution), with 65 grid layers in the vertical direction. The setting of thermal property parameters for surface materials integrated field sampling analysis and calibration results from existing literature (Meng et al., 2024): ① Impervious surfaces: Dominated by asphalt, with parameters set with reference to the heat conduction and radiation characteristics of typical urban asphalt pavements; ② Pervious surfaces: Mainly composed of loam, with parameters determined based on the heat capacity and thermal conductivity of soil samples from the study area; ③ Vegetation parameters: Set in combination with the leaf radiation characteristics and transpiration parameters of common tree species in Beijing, which affect the surrounding thermal environment through transpiration and shading. To reduce boundary effects, a

10-layer nested grid technique was used (Kong et al., 2016), with surface materials set as a mixture of loam and asphalt. The model's boundary meteorological parameters (temperature, humidity, wind speed, wind direction) were updated every 30 minutes using a complete forcing method, with data obtained from meteorological station measurements. For model validation, the  $R^2$  and RMSE were adopted, with a focus on the simulation accuracy of air temperature at a height of 1.5 meters. Typical urban meteorological stations in Beijing were selected, multi-scenario simulation schemes were designed, and emphasis was placed on analyzing the mechanisms by which morphological indicators act on CUHI, canopy ventilation, and radiation exchange."

#### **Reference:**

Di Giuseppe, E., Ulpiani, G., Cancellieri, C., Di Perna, C., D'Orazio, M., & Zinzi, M.: Numerical modelling and experimental validation of the microclimatic impacts of water mist cooling in urban areas, *Energy and Buildings*, 231, 110638, <https://doi.org/10.1016/j.enbuild.2020.110638>, 2021.

Forouzandeh, A.: Prediction of surface temperature of building surrounding envelopes using holistic microclimate ENVI-met model, *Sustainable Cities and Society*, 70, 102878, <https://doi.org/10.1016/j.scs.2021.102878>, 2021.

Berardi, U., Jandaghian, Z., & Graham, J.: Effects of greenery enhancements for the resilience to heat waves: A comparison of analysis performed through mesoscale (WRF) and microscale (Envi-met) modeling, *Science of the Total Environment*, 747, 141300, <https://doi.org/10.1016/j.scitotenv.2020.141300>, 2020.

Meng, Q., Gao, J., Zhang, L., et al.: Coupled cooling effects between urban parks and surrounding building morphologies based on the microclimate evaluation framework integrating remote sensing data, *Sustainable Cities and Society*, 102, 105235, <https://doi.org/10.1016/j.scs.2024.105235>, 2024.

Kong, F., Sun, C. F., Liu, F. F., Yin, H. W., Jiang, F., Pu, Y. X., et al.: Energy saving potential of fragmented green spaces due to their temperature regulating ecosystem services in the summer, *Applied Energy*, 183, 1428–1440, <https://doi.org/10.1016/j.apenergy.2016.09.070>, 2016.

**5. Line 177: the larger nighttime CUHI than daytime CUHI shall be better explained. there have been many studies in the literature, and it will be good to have at least some comparisons against CUHI during HW at different cities.**

**Response:** Thank you for your valuable suggestion. We have strengthened the explanation of the causes for the diurnal differences in CUHII in the manuscript and added comparisons with the diurnal variation characteristics of CUHII in cities such as Shanghai and Athens. The revised content can be found in lines 199–211:

“It should be noted that during both NHW and HW periods, nighttime CUHII is generally significantly higher than daytime CUHII. This can be explained by the urban-rural differences in energy budgets: during the daytime, cities are heated by solar radiation, with surface heat transferred to the atmosphere through turbulence and regulated by ventilation conditions; at nighttime, urban buildings and impervious surfaces release stored heat, while suburbs form radiative cooling due to vegetation cover, further widening the urban-rural temperature difference (Zhou et al., 2019; Shen et al., 2024). Furthermore, the diurnal variation characteristics of CUHII are not absolute, as their intensity and timing distribution vary with the geographical environment of cities. For example, the CUHII in Shanghai during HW periods and its difference from that in non-heatwave periods are strongest around noon (Ao et al., 2019; Tan et al., 2010), and this pattern has also been verified in Athens, Greece (Founda et al., 2017). Such differences from Beijing (where nighttime CUHII is stronger) mainly stem from variations in local circulation: coastal cities like Shanghai and Athens are significantly affected by sea-land breeze advective cooling, and the large heat capacity of seawater weakens the nighttime urban-rural temperature difference; in contrast, nighttime CUHII in Beijing, an inland city, is mainly dominated by surface radiation budgets (Ao et al., 2019).”

**Reference:**

Founda, D., Santamouris, M.: Synergies between urban heat island and heat waves in Athens (Greece), during an extremely hot summer (2012), Scientific Reports, 7(1), 10973, 2017. 10.1038/s41598-017-11407-6

- Tan, J., Zheng, Y., Tang, X., Guo, C., Li, L., Song, G., Zhen, X., Yuan, D., Kalkstein, A. J., F Li:  
The urban heat island and its impact on heat waves and human health in Shanghai,  
International Journal of Biometeorology, 54, 75–84, 2010. 10.1007/S00484-009-0256-X
- Ao, X., Wang, L., Zhi, X., Gu, W., Yang, H., Li, D.: Observed synergies between urban heat  
islands and heat waves and their controlling factors in Shanghai, China, Journal of Applied  
Meteorology and Climatology, <https://doi.org/10.1175/jamc-d-19-0073.1>, 2019.
- Zhou, D., J Xiao, S Bonafoni, C Berger, Deilami, Kaveh, Zhou, Yuyu, Froking, Steve, Yao,  
Rui, Qiao, Zhi, Sobrino, José: Satellite remote sensing of surface urban heat islands: Progress,  
challenges, and perspectives, Remote Sens., 11, 48, 2019. 10.3390/rs11010048
- Shen, P., Zhao, S., Zhou, D., Lu, B., Han, Z., Ma, Y., Wang, Y., Zhang, C., Shi, C., Song, L.:  
Surface and canopy urban heat island disparities across 2064 urban clusters in China, Science  
of the Total Environment, 955, <https://doi.org/10.1016/j.scitotenv.2024.177035>, 2024.

**6. Line 189-196: The explanation here relies on visual interpretation of Figs. 3 and 4. I think this part can be removed as Fig.5 shows more reliable statistical analyses.**

**Response:** We apologize for the unclear description. As you correctly pointed out, this part does rely too much on visual interpretation, especially the analysis of Fig. 4. The reason we introduced urban morphology in Section 3.1 was to conduct a preliminary analysis here, laying the groundwork for the in-depth analysis in the following sections. In response to your comment, we have reorganized the relevant content to reduce reliance on visual interpretation and better connect it with the more reliable statistical analyses in Fig. 5. The revised content is shown in Lines 218-229:

“ Spatial analysis of daytime CUHII (Figure 3a) reveals that the Second Ring Road exhibits the highest CUHII values across all metrics: 0.27°C during NHW periods, 0.65°C during HW periods, and a difference of 0.38°C between the two. Analysis of urban configuration structures (Figure 4a) shows that the Second Ring has the highest proportion of dense buildings, and the compact layout leads to the accumulation of solar radiation heat in dense building clusters during the day, which is difficult to diffuse (Ge et al., 2016). This may be an important reason for the increase in daytime

CUHII during the HW periods. The nighttime CUHII differs (Figure 3b), with the Fourth Ring having the highest CUHII (1.80°C during NHW periods, 2.52°C during HW periods, and a difference of 0.72°C between the two). The Fourth Ring exhibits the highest proportion of high-rise buildings (Figure 4b). The concentrated emission of anthropogenic heat sources, such as air conditioners, in these high-rise zones (Yin & Zhao, 2024) could potentially contribute to the intensification of nighttime CUHII during heatwave events. Thus, urban morphology may be an important factor for the formation of diurnal patterns of CUHII. In the following sections, this study will conduct more reliable analyses using machine learning and numerical simulation methods.”

**7. Fig.5: Are these results from XGBoost model? How is the model evaluated? For daytime results, the correlation value is small for all indicators except for BCR, which is only about 0.3; This seems to suggest that model performance is bad, or no single indicator is powerful enough to explain the CUHI. For nighttime results, many 3D indicators have coefficients very closed to SVF, and thus it is hard to argue that SVF is the dominant factor. The results can be changed with slight modifications of the data or training processes. Without rigorous model validation, the SHAP results in Fig.6 are less meaningful.**

**Response:** We apologize for the unclear description. Figure 5 presents statistical results based on the linear Pearson correlation model, which was used to conduct a preliminary analysis of the relationship between urban morphological indicators and CUHII before machine learning analysis. We have supplemented this explanation in the figure caption and the main text. As you pointed out, there were inappropriate descriptions of SVF. We have revised the relevant content accordingly.

In addition, as you emphasized, rigorous model validation is crucial for subsequent SHAP analysis. Regarding the evaluation of the XGBoost model, we have provided a detailed response and supplementary information in Comment 3, and here we will give a brief summary. In this study, the coefficient of determination ( $R^2$ ) and root mean square error (RMSE) were selected as evaluation metrics for simulation

accuracy. We have added content related to the performance of the XGBoost model in predicting CUHII: for the test dataset (Fig. S1), the  $R^2$  values all exceed 0.45, while the RMSE values are all within 0.05. These results indicate that the XGBoost model can be regarded as a reliable tool for fitting the relationship between CUHII and urban morphology.

**8. Fig.8: the derivation and meaning of PDP plots shall be elaborated for general readers not familiar with this method. Current discussions related to Figure 8 are hard to understand.**

**Response:** Thank you for your valuable suggestion. We apologize for the insufficient explanation of the Partial Dependence Plot (PDP) method, which may have caused difficulties in understanding. Explainable machine learning techniques can help understand the prediction process of "black-box models", as well as how the relationships between variables change within their value ranges (Bansal & Quan, 2024). Such post-hoc explanation techniques can probe into the model to reveal the relationships between variables. Partial Dependence Plot (PDP) is a commonly used technique that can present the marginal effects of independent variables (Friedman, 2001). The generated plots show partial dependence function values, which are the average marginal effects on the prediction results (Molnar, 2020). The partial dependence function is defined as follows:

$$\hat{f}_s(x_s) = E_{x_c}[\hat{f}(x_s, x_c)] = \int \hat{f}(x_s, x_c) dP(x_c) \quad (1)$$

Where  $x_s$  is the target feature whose effects are to be studied,  $x_c$  are other marginalized features, and  $P$  represents the marginal probability density. The function  $\hat{f}_s$  can be estimated using the Monte Carlo approximation method, with the formula as follows:

$$\hat{f}_s(x_s) = \frac{1}{n} \sum_{i=1}^n \hat{f}(x_s, x_c^{(i)}) \quad (2)$$

where  $x_c^{(i)}$  denotes the value of  $x_c$  in the dataset, and  $n$  is the sample size.

Due to the model-agnostic nature of the above PDP specification, it can be applied to both traditional linear regression models and machine learning models such as XGBoost. For linear models, PDP can present marginal effects when other

independent variables take their mean values; for machine learning models, PDP can present the relationships between variables based on the tree structure of the model (Bansal & Quan, 2024).

To address this, we have supplemented the derivation and core meaning of PDP plots at the beginning of the discussion on Figure 8, aiming to help general readers grasp the method first. Additionally, we have adjusted the expression of results related to Figure 8 to enhance readability. The revised content is shown in Lines 287-291.

**Reference:**

Bansal, P., Quan, S. J.: Examining temporally varying nonlinear effects of urban form on urban heat island using explainable machine learning: A case of Seoul, *Building and Environment*, 247, 1.1–1.20, <https://doi.org/10.1016/j.buildenv.2023.110957>, 2024.

Friedman, J. H.: Greedy Function Approximation: A Gradient Boosting Machine, *Annals of Statistics*, 29(5), 1189–1232, <https://doi.org/10.2307/2699986>, 2001.

**9. Fig.9: How did the authors modify the physical domain to have different SVFs, increase building height or reduce road width? Is such increment or decrement uniform across the entire domain?**

**Response:** Thank you for your inquiry. We apologize for not clarifying the specific method of SVF adjustment. To address this, we have supplemented details on the modification of the physical domain: SVF in different scenarios was adjusted only by changing building heights (without altering street width, building area, or other spatial parameters), and the adjustment was applied uniformly across the entire simulation domain. The revised description is as follows:

“This section selected a 500-meter radius area around Station 651061 on the North Fourth Ring Road as the simulation region, where the BCR was 0.225 and the SVF was 0.76. Three scenarios were set up by adjusting building heights (with street width, building footprint, and BCR kept unchanged to isolate the independent effect of SVF):

① Scenario I: Used the original building heights in the study area, corresponding to the real SVF (0.76, Figure 9a); ② Scenario II: Based on the PDP analysis results of the machine learning model, building heights were adjusted to reduce SVF to 0.735

(the critical point of positive/negative effects, Figure 9b); ③ Scenario III: Building heights were further adjusted to reduce SVF to 0.685 (the rapid growth stage of negative effects, Figure 9c). Notably, building height modifications were applied uniformly across the entire simulation domain to ensure consistent spatial conditions except for SVF differences.”

**10. Figs. 10 and 11: After changing SVF in the ENVI-met domain, authors only analyze the temperature at the central point of the domain, this is too simple. In fact, using ENVI-MET at 1 neighborhood with different SVFs to demonstrate that temperature will change differently from NHW to HW does not sound convincing or necessary.**

**Response:** Thank you for your critical insight. We agree that analyzing only the central point temperature is insufficient to reflect spatial variations, and we apologize for the oversimplified interpretation. To address this, we have supplemented spatial heterogeneity analysis of temperature responses across the entire domain, rather than focusing solely on the central point. In addition, we have merged Figures 10 and 11 to facilitate the comparison of diurnal and nocturnal characteristics under different simulation scenarios. The revised content is as follows:

“The figure above shows the simulated AT spatial distribution under different scenarios during daytime (Figure 10a). Spatial patterns reveal that during NHW periods, Scenario II shows a 0.2–0.7°C temperature rise across the study region. The central point confirms this trend, with AT increasing from 30.68°C in Scenario I to 31.09°C in Scenario II. Meanwhile, Scenario III exhibits a 0.3–0.8°C cooling in these areas, driven by building shadows, with the central point AT in Scenario III decreasing to 30.33°C. During HW periods, these effects intensify. Scenario II sees a 0.5–1.1°C warming across these zones, with the central point air temperature in Scenario II increasing from 35.01°C to 35.76°C. Scenario III shows a 0.6–1.4°C cooling in study region, with the central point AT in Scenario III dropping to 34.39°C. As SVF decreased, the obstruction of building clusters to air flow intensified, reducing the heat dissipation capacity. Meanwhile, blocking of long wave radiation was



exacerbated, promoting heat accumulation and leading to temperature increases. It should be noted that the temperature change patterns in Scenario III, like the drop in central point AT, are related to excessively low SVF significantly increasing building shadow areas, enhancing the shading effect on solar radiation, thus reducing surface heat absorption and inhibiting temperature rise (Perini & Magliocco, 2014). Figure 10b shows the spatial distribution of the simulated AT indifferent scenarios at night. During NHW periods, the central point AT in Scenario I was 24.86°C, increasing to 25.10°C in Scenario II with a relatively small variation, while that in Scenario III increased significantly to 25.90°C. During HW periods, the central point AT in Scenario I was 26.25°C, increasing to 26.83°C in Scenario II and increased significantly to 27.93°C in Scenario III. Notably, this pattern of temperature variation (moderate rise in Scenario II, sharp increase in Scenario III) is consistent across the entire simulation domain. The increase in building height hinders the convective heat dissipation of nighttime air, making heat dissipation difficult and thus promoting a significant temperature rise (Mo et al., 2024). Furthermore, the temperature differences between the scenarios during the HW periods were more significant than during the NHW periods, indicating that changes in building height have a more pronounced impact on air temperature during the HW periods, further amplifying the non-linear modulation of the building SVF in AT.”

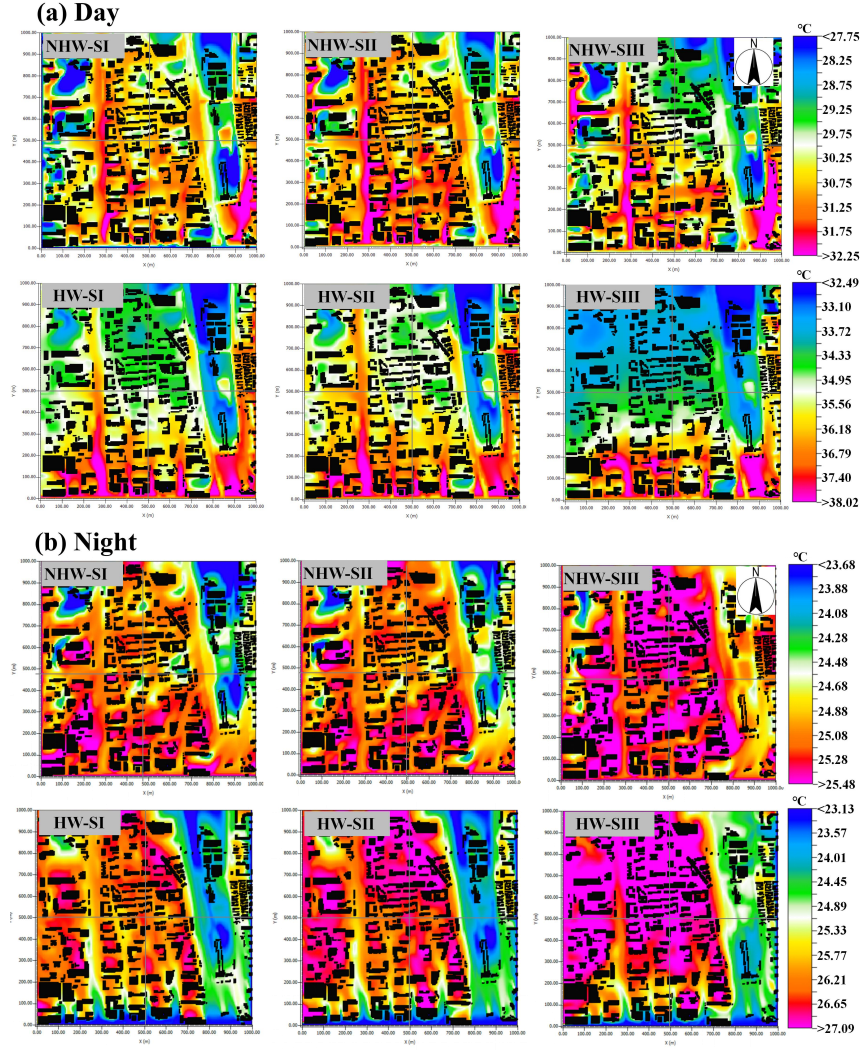

**Figure 10:** Spatial distributions of simulated AT across scenarios during daytime (a) and nighttime (b). NHW-SI represents Scenario I during NHW periods, HW-SI represents Scenario I during HW periods, and so forth. The intersection of the two gray crosshairs in each subplot indicates the location of the meteorological station.

11. Section 4: the discussion section focuses on analyzing the impact of wind on CUHI. However, the correlation is very weak. In addition, this part seems to deviate from previous correlation and SHAP results. From my perspective, authors seem to combine too many methods (XGBoost, ENVI-met, and correlation with wind) to explain CUHI change under HW, and this paper lacks a good organization and logic flow. After reading the paper, I am not sure what authors aim to address, and what are the key findings.

**Response:** Thank you very much for your valuable comments, which have helped us identify critical issues in our discussion. We sincerely apologize for the unclear presentation in Section 4. We have carefully revised this section to address these concerns, and the key explanations are as follows:

“Figure 12a shows that during the daytime, the correlation coefficients ( $r$ ) between WS and CUHII were -0.14 during NHW periods and -0.18 during HW periods, indicating a weak negative correlation that was slightly stronger during HW periods. Deng et al. (2025) simulated that a 10% increase in WS could reduce the CUHII by 0.16°C during summer days. Stronger solar radiation during HW periods makes the heat dissipation effect of wind more significant for CUHII. During night (Figure 12b), the  $r$  was -0.19 during NHW periods and -0.27 during HW periods, with enhanced negative correlations compared to daytime, especially during HW periods. This may be related to the heat dissipation characteristics of the underlying urban surface during nighttime (Liu et al., 2022), where slower heat release makes the modulation of WS in CUHII more pronounced. Notably, compared with research findings from other cities (Yang et al., 2023; Rajagopal et al., 2023; Deng et al., 2025), the CUHII in Beijing exhibits a unique characteristic—it is insensitive to WS variations both during the daytime and nighttime. This phenomenon may be explained by the regulatory role of local geographical environments: existing studies have confirmed that local circulations formed under different geographical backgrounds can significantly reshape the spatiotemporal distribution of urban extreme high temperatures (Zhang et al., 2011; Zhou et al., 2020; Chen et al., 2022). Specifically for Beijing, the mountainous terrain in its western and northern regions gives rise to a typical mountain-valley wind circulation, which exerts a strong regulatory effect on the urban near-surface thermal dynamic field (Miao et al., 2013). Observations show that wind directions in Beijing’s urban area display a regular diurnal variation: northerly winds (mountain breeze) dominate from 05:00 to 10:00 Beijing Time; there is an obvious reversal around 11:00, shifting to southerly winds (valley breeze) which persist until 04:00 the next day. Additionally, the average wind speed of mountain breeze is significantly lower than that of valley breeze (Zheng et al., 2018b). Such distinct

periodic characteristics make mountain-valley breeze a key local factor influencing Beijing's thermal environment (Dou et al., 2014). Based on this, we speculate that the “insensitivity of CUHII to WS variations” observed in this study may be the result of interactions between the mountain-valley breeze cycle and the inherent diurnal cycle of CUHII—the superposition of these two periodic processes may weaken the regulatory effect of WS variations on CUHII. ”

In short, the coupling mechanism between mountain-valley breezes and the diurnal cycle of CUHII (Fig. R1) may hold the key to explaining how WS acts on CUHII. We will further quantify this mechanism through refined numerical simulations in future research.

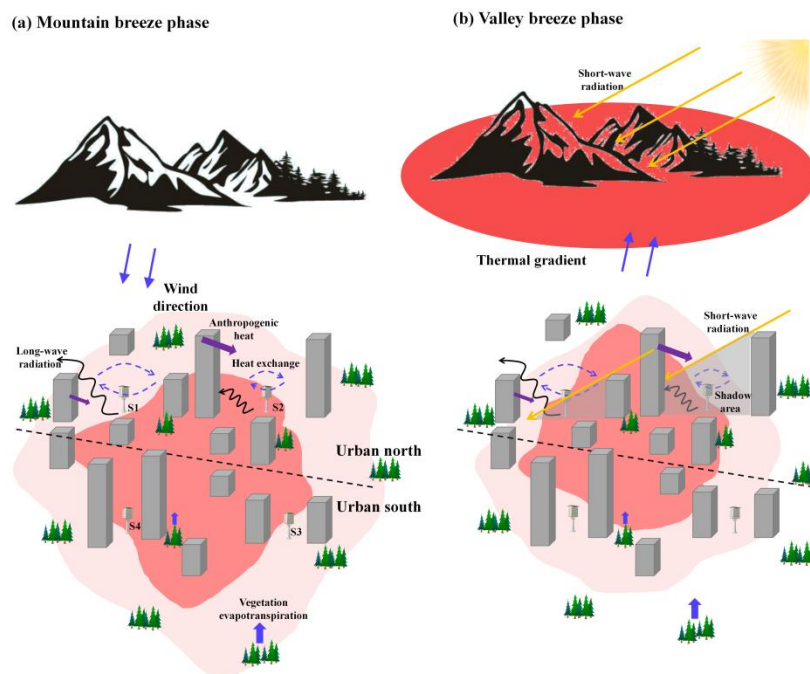

**Figure R1:** Schematic diagram illustrating the modulation of CUHII by mountain-valley breeze (self-draw).

#### Reference:

Chen, S., Yang, Y., Deng, F., Zhang, Y., Liu, D., Liu, C., Gao, Z.: A high-resolution monitoring approach of canopy urban heat island using a random forest model and multi-platform observations, *Atmospheric Measurement Techniques*, 15, 735–756, <https://doi.org/10.5194/amt-15-735-2022>, 2022.

- Dou, J., Wang, Y., Miao, S.: Fine spatial and temporal characteristics of humidity and wind in Beijing urban area, *Journal of Applied Meteorological Science*, 25, 5, 559–569, <https://doi.org/10.11898/1001-7313.20140505>, 2014.
- Miao, Y., Liu, S., Chen, B., Zhang, B., Wang, S., Li, S.: Simulating urban flow and dispersion in Beijing by coupling a CFD model with the WRF model, *Advances in Atmospheric Sciences*, 30, 6, 1663–1678, <https://doi.org/10.1007/s00376-013-2234-9>, 2013.
- Rajagopal, P., Priya, R. S., & Senthil, R.: A review of recent developments in the impact of environmental measures on urban heat island, *Sustainable Cities and Society*, 88, 104279, <https://doi.org/10.1016/j.scs.2022.104279>, 2023.
- Zhang, N., Zhu, L. F., Zhu, Y.: Urban heat island and boundary layer structures under hot weather synoptic conditions: A case study of Suzhou City, China, *Advances in Atmospheric Sciences*, 28, 4, 855–865, <https://doi.org/10.1007/s00376-010-0040-1>, 2011.
- Zheng, Z., Ren, G., Gao, H.: Analysis of the local circulation in Beijing area, *Meteorological Monthly*, 44, 3, 425–433, <https://doi.org/10.7519/j.issn.1000-0526.2018.03.009>, 2018.
- Zhou, X., Okaze, T., Ren, C., Cai, M., Mochida, A.: Evaluation of urban heat islands using local climate zones under the influences of sea-Land breeze, *Sustainable Cities and Society*, 55, 102060, <https://doi.org/10.1016/j.scs.2020.102060>, 2020.

In addition, We apologize for the unclear organization and vague presentation of the research objectives and key findings in the original manuscript, which may have caused confusion about how we integrated the methods (XGBoost, ENVI-met, and wind correlation analysis) and the core logic. To fix this, we have revised the abstract and conclusion. We now clarify that the methods work together (rather than being simply combined) and clearly present the central research objective and key findings. Specifically:

Revised abstract: Currently, the diurnal asymmetric and nonlinear mechanisms by which urban morphology modulates the canopy urban heat island (CUHI) during heat wave (HW) periods remain underexplored. This study aims to fill this gap by focusing on the area within the Fifth Ring Road of Beijing, integrating three complementary methods: XGBoost (to identify key morphological drivers), ENVI-met (to reveal

nonlinear regulatory processes), and wind environment analysis (to supplement dynamic modulation). The results show that: (1) HW periods significantly enhance CUHI intensity (CUHII) compared to non-heat wave (NHW) periods, with a 91.3% increase in daytime and 52.7% at night; (2) XGBoost identifies building coverage ratio (BCR) as the core daytime driver of CUHII, while sky view factor (SVF) dominates at night, and both 2D and 3D morphological indicators exert stronger effects during HW periods; (3) ENVI-met simulations reveal nonlinear mechanisms of building height/SVF: daytime thermal environments are co-driven by short-wave radiation shading and ventilation resistance (as SVF decreases), while nighttime environments are dominated by long-wave radiation accumulation by buildings; (4) Wind environment analysis further shows diurnal differences in wind's role: nighttime ventilation corridors mitigate CUHII by 33.91–42.09%, while daytime prevailing winds may exacerbate downstream CUHII via thermal advection. These findings clarify the diurnal asymmetric mechanisms of CUHI and provide scientific support for urban morphological optimization under extreme heat.

Revised conclusions: By integrating ground observations, XGBoost, and ENVI-met simulations, this study systematically unravels the diurnal asymmetric and nonlinear response of canopy urban heat island (CUHI) to urban morphology during heat wave (HW) periods in Beijing. The results show that compared with non-heat wave (NHW) periods, CUHI intensity (CUHII) during HW periods is significantly enhanced, with a 91.3% increase in daytime and 52.7% at night, and its diurnal variation presents a U-shaped fluctuation with distinct spatial patterns (strongest within the Second Ring Road in daytime and most prominent around the Fourth Ring Road at night). Machine learning analysis indicates that building coverage ratio (BCR) is the most critical driver of daytime CUHII, while sky view factor (SVF) dominates at night; the mean importance of 2D/3D morphological indicators increases by 16.2%–36.7% during HW periods, with significant interactions between BCR and SVF. ENVI-met simulations further confirm the nonlinear modulation mechanism of urban morphology: when SVF decreases from 0.735 to 0.685, daytime temperature regulation is jointly affected by short-wave radiation shading and ventilation



resistance, showing a "first warming then cooling" pattern, while nighttime temperature changes are dominated by the reflection and accumulation of long-wave radiation by buildings, exhibiting accelerated warming characteristics. Additionally, the study identifies diurnal differences in the impact of wind fields on CUHI: ventilation corridors can reduce nighttime CUHI by 33.91%–42.09% to mitigate heat islands effectively, whereas daytime prevailing winds may intensify CUHI in downstream regions through thermal advection rather than simply acting as a cooling factor. These findings clarify the diurnal asymmetric formation mechanism of CUHI during HW periods and provide quantitative references for optimizing urban morphology and planning ventilation corridors, offering precise scientific guidance for mitigating urban thermal risks.

**Minor comments:**

**1. Fig.1 caption: "Overview of study area" is repeated.**

**Response:** Thank you for your comment. We apologize for the repetition of "Overview of study area" in the caption of Fig. 1. This issue has been corrected. Additionally, we have carefully checked the entire manuscript to avoid similar writing problems.

**2. Line 167: remove "the next day" as this is a averaged diurnal cycle**

**Response:** Thank you for your reminder. We have removed "the next day" from Line 167, as it is indeed inappropriate in the context of an averaged diurnal cycle.

**3. Fig.3 caption: only (a) and (b) sub-figures; and I suggest authors to add the different in CUHI between HW and NHW to better illustrate the distribution of CUHI change**

**Response:** Thank you for your professional suggestion. As you recommended, we have added the difference in CUHI between HW and NHW to Fig. 3 and conducted relevant analyses in the text.

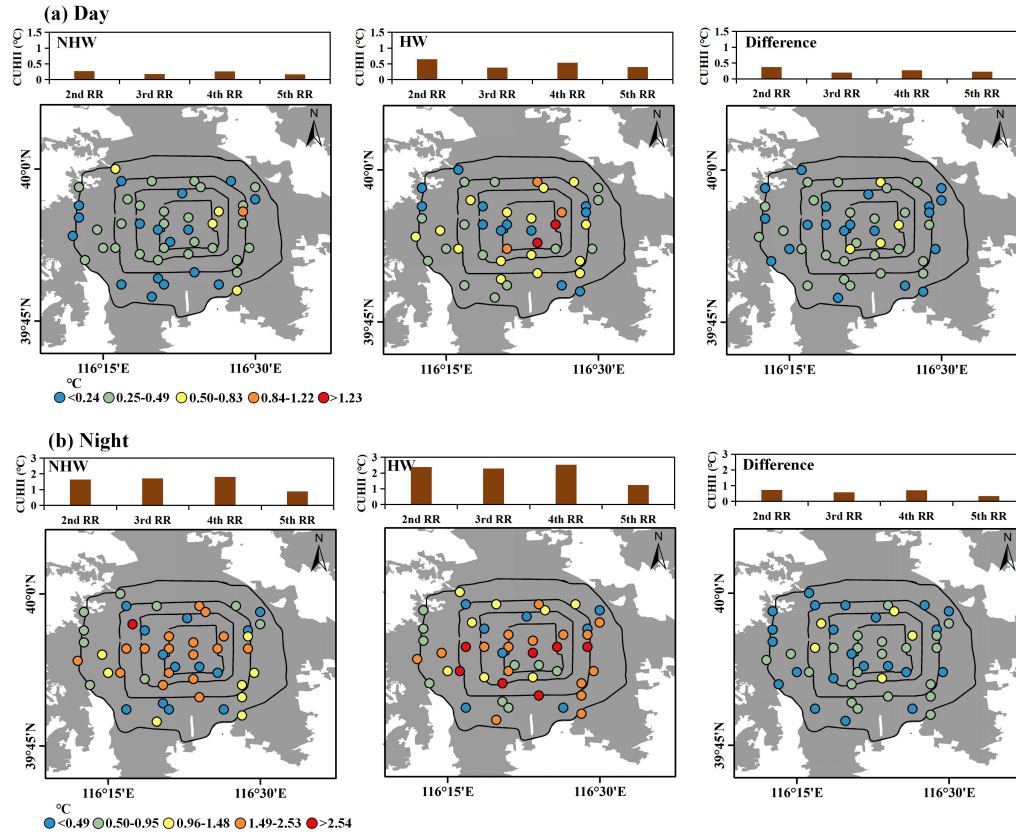

**Figure: 3** Diurnal spatial patterns of CUHII during NHW & HW. Panel (a) for daytime, (b) for nighttime. In each panel, left: NHW CUHII stats & distribution; middle: HW CUHII stats & distribution; right: HW-NHW CUHII difference.
